# Supplementary material for: Secreted Frizzled-Related Protein 2 (sFRP2) promotes osteosarcoma invasion and metastatic potential
Source: PubMed Central journal article supplement (PMC5100268; doi:10.1186/s12885-016-2909-6), 2016-11-08

# Supplemental Figure 2

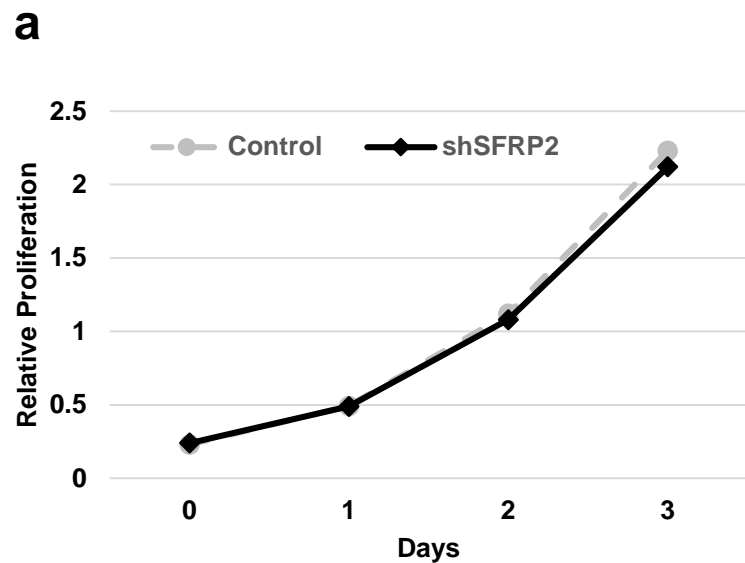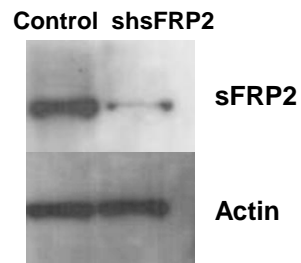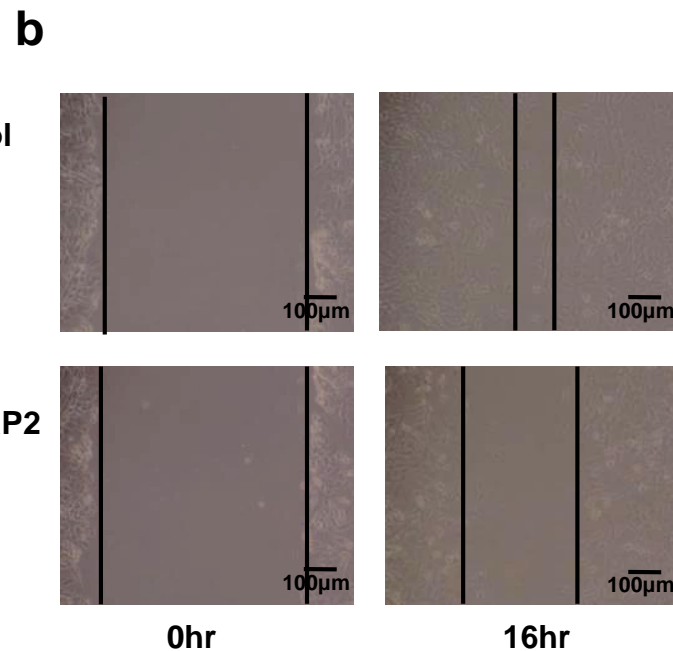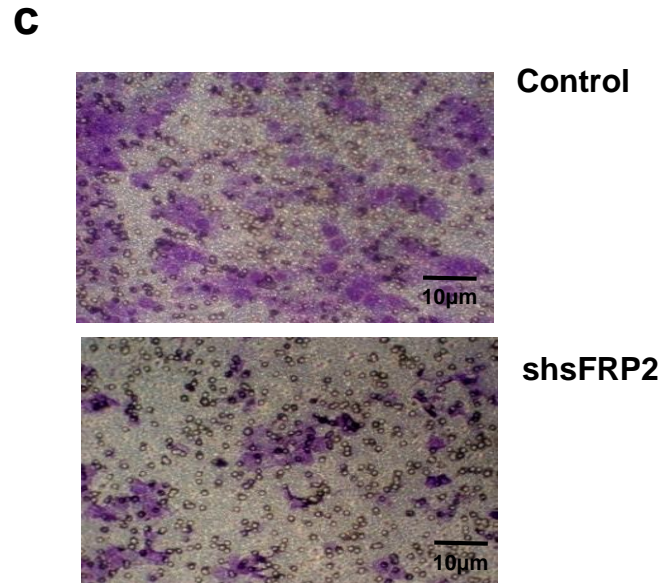

Supplement: 12885_2016_2909_MOESM2_ESM.pdf [file 12885_2016_2909_MOESM2_ESM.pdf]
